# Supplementary material for: A fluorescent sensor for folic acid based on crown ether-bridged bis-tetraphenylethylene
Source: Royal Society of Chemistry journal article supplement (doi:10.1039/c9an00161a), 2019-01-01
Supplement: c9an00161a1.pdf [file c9an00161a1.pdf]

## Supporting Information

# A fluorescent sensor for folic acid based on crown ether-bridged bis-tetraphenylethylene

Shengjie Jiang,<sup>a</sup> Xiujuan Hu,<sup>a</sup> Jiabin Qiu,<sup>a</sup> Hongyu Guo,<sup>\*a, b</sup> and Fafu Yang<sup>\*a, b, c</sup>

<sup>a</sup> College of Chemistry and Materials, Fujian Normal University, Fuzhou 350007, P.R.China; E-mail: yangfafu@fjnu.edu.cn

<sup>b</sup> Fujian Key Laboratory of Polymer Materials, Fuzhou 350007, P.R. China

<sup>c</sup> Fujian provincial Key Laboratory of Advanced Materials Oriented Chemical Engineering, Fuzhou 350007, P.R. China

E-mail: yangfafu@fjnu.edu.cn

## 1. General

All chemical reagents were obtained from J&K Chemicals and were used directly. TLC analysis was done on pre-coated glass plates. Silica gel (200-300 mesh) was used for the purification of column chromatography. NMR spectra were investigated on a Bruker-ARX 400 instrument at 25°C. MS spectra were measured on Bruker mass spectrometer. Compound **2** was prepared by published procedure (European Journal of organic chemistry, 2001, 365-368). Compound **5** was prepared by reacting 2-hydroxybenzophenone and benzophenone in Zn, TiCl<sub>4</sub>/THF system according to the published literature (J. Mater. Chem., 2012, 22, 3323-3326).

## 2. The synthetic process and characteristic spectra.

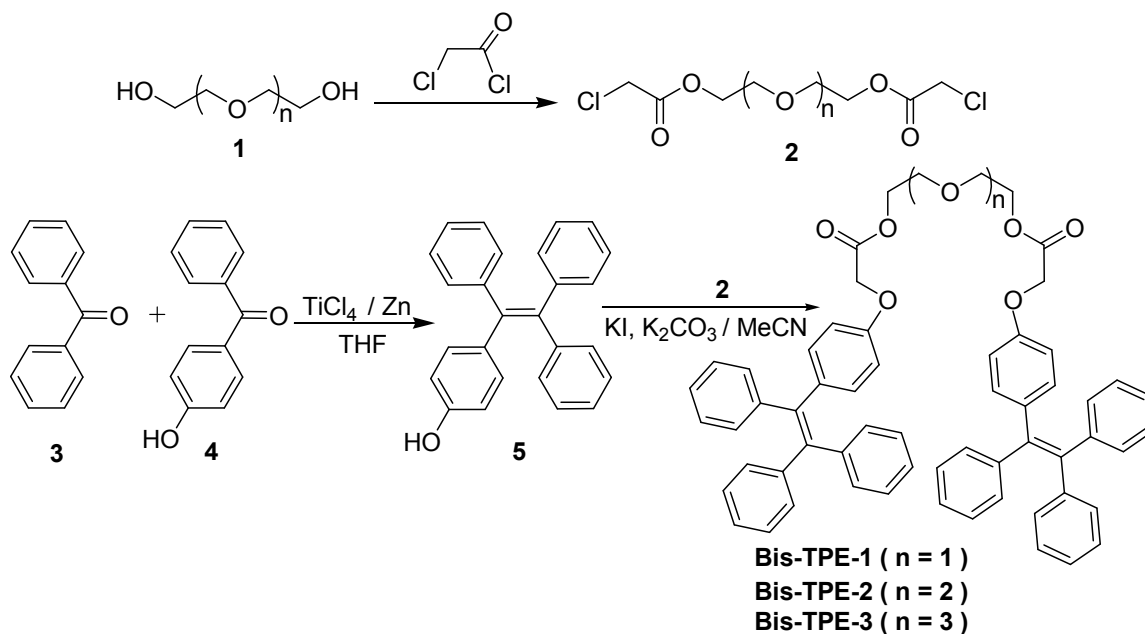

**Scheme S1** The synthetic route for target compound **Bis-TPE**

## 2.1 Synthesis of Bis-TPE-1, Bis-TPE-2 and Bis-TPE-3.

The mixture of compound **5** (0.348 g, 1 mmol), anhydrous potassium carbonate (1.0 g, 7.2 mmol) and compound **2** (0.5 mmol) were stirred and refluxed in 40 mL of dry acetonitrile overnight. TLC detection indicated that the starting materials almost completely disappeared. After reaction, 50 mL of 1 M HCl solution was added dropwise to the reaction mixture, and extracted with CHCl<sub>3</sub> (20 mL×3). The organic phase was separated and concentrated under reduced pressure. The residue was purified by column chromatography (eluent: CH<sub>2</sub>Cl<sub>2</sub>/hexane = 1/2) to afford **Bis-TPE-1**, **Bis-TPE-2** and **Bis-TPE-3** as pale yellow solids in yields of 78%, 80% and 84%, respectively.

**Bis-TPE-1**: <sup>1</sup>H NMR(400 MHz, CDCl<sub>3</sub>): δppm: 7.06-7.14 (m, 30H, ArH), 6.99(d, *J* = 8.0 Hz, 4H, ArH), 6.68(d, *J* = 8.0 Hz, 8H, ArH), 4.61 (s, 4H, OCH<sub>2</sub>), 4.37 (bs, 4H, OCH<sub>2</sub>), 3.70 (bs, 4H, OCH<sub>2</sub>). <sup>13</sup>C NMR (100 MHz, CDCl<sub>3</sub>), δppm: 168.93, 156.38, 144.26, 143.99, 143.93, 140.58, 140.36, 137.33, 132.71, 131.43, 128.50, 127.88, 127.77, 127.49, 126.68, 126.57, 126.48, 113.98, 67.83, 65.24, 64.04. MALDI-TOF-MS (C<sub>60</sub>H<sub>50</sub>O<sub>7</sub>) Calcd.for *m/z* = 882.356, found: *m/z* = 882.346 (M<sup>+</sup>). Anal.calcd for C<sub>60</sub>H<sub>50</sub>O<sub>7</sub>: C 81.61, H 5.71; found C 81.66, H 5.66.

**Bis-TPE-2**: <sup>1</sup>H NMR(400 MHz, CDCl<sub>3</sub>): δppm: 7.01-7.14 (m, 30H, ArH), 6.95(d, *J* = 8.0 Hz, 4H, ArH), 6.65(d, *J* = 8.0 Hz, 4H, ArH), 4.59 (s, 4H, OCH<sub>2</sub>), 4.36 (t, *J* = 8.0 Hz, 4H, OCH<sub>2</sub>), 3.71 (t, *J* = 8.0 Hz, 4H, OCH<sub>2</sub>), 3.62 (s, 4H, OCH<sub>2</sub>). <sup>13</sup>C NMR (100 MHz, CDCl<sub>3</sub>), δppm: 168.92, 156.25, 143.92, 140.52, 140.30, 137.28, 132.71, 128.64, 127.80, 126.48, 126.40, 113.91, 70.60, 69.00, 65.26, 63.98. MALDI-TOF-MS (C<sub>62</sub>H<sub>54</sub>O<sub>8</sub>) Calcd.for *m/z* = 926.382, found: *m/z* = 926.383 (M<sup>+</sup>). Anal.calcd for C<sub>62</sub>H<sub>54</sub>O<sub>8</sub>: C 80.32, H 5.87; found C 80.38, H 5.83.

**Bis-TPE-3**: <sup>1</sup>H NMR(400 MHz, CDCl<sub>3</sub>): δppm: 7.01-7.13 (m, 30H, ArH), 6.95(d, *J* = 8.0 Hz, 4H, ArH), 6.65(d, *J* = 8.0 Hz, 4H, ArH), 4.59 (s, 4H, OCH<sub>2</sub>), 4.36 (bs, 4H, OCH<sub>2</sub>), 3.71 (bs, 4H, OCH<sub>2</sub>), 3.64 (s, 8H, OCH<sub>2</sub>). <sup>13</sup>C NMR (100 MHz, CDCl<sub>3</sub>), δppm: 168.27, 155.91, 143.92, 140.24, 139.84, 136.99, 132.36, 131.08, 128.27, 127.54, 127.14, 126.70, 126.13, 113.63, 76.01, 68.51, 67.65, 64.78, 63.69. MALDI-TOF-MS (C<sub>64</sub>H<sub>58</sub>O<sub>9</sub>) Calcd.for *m/z* = 970.408, found: *m/z* = 970.498 (M<sup>+</sup>). Anal.calcd for C<sub>64</sub>H<sub>58</sub>O<sub>9</sub>: C 79.15, H 6.02; found C 79.19, H 5.97.



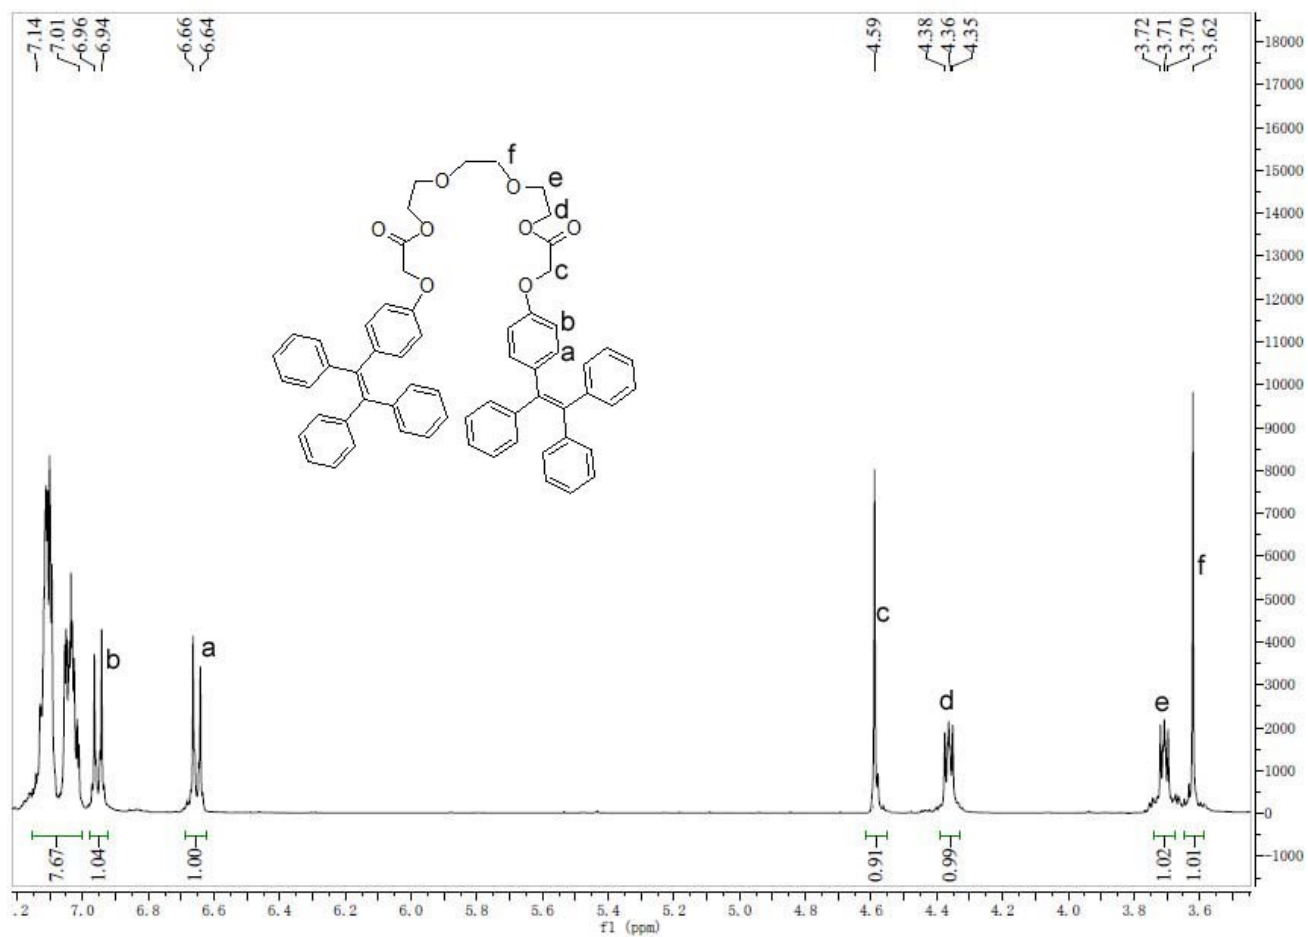

Figure S2. The  $^1\text{H}$  NMR spectrum of compound **Bis-TPE-2**

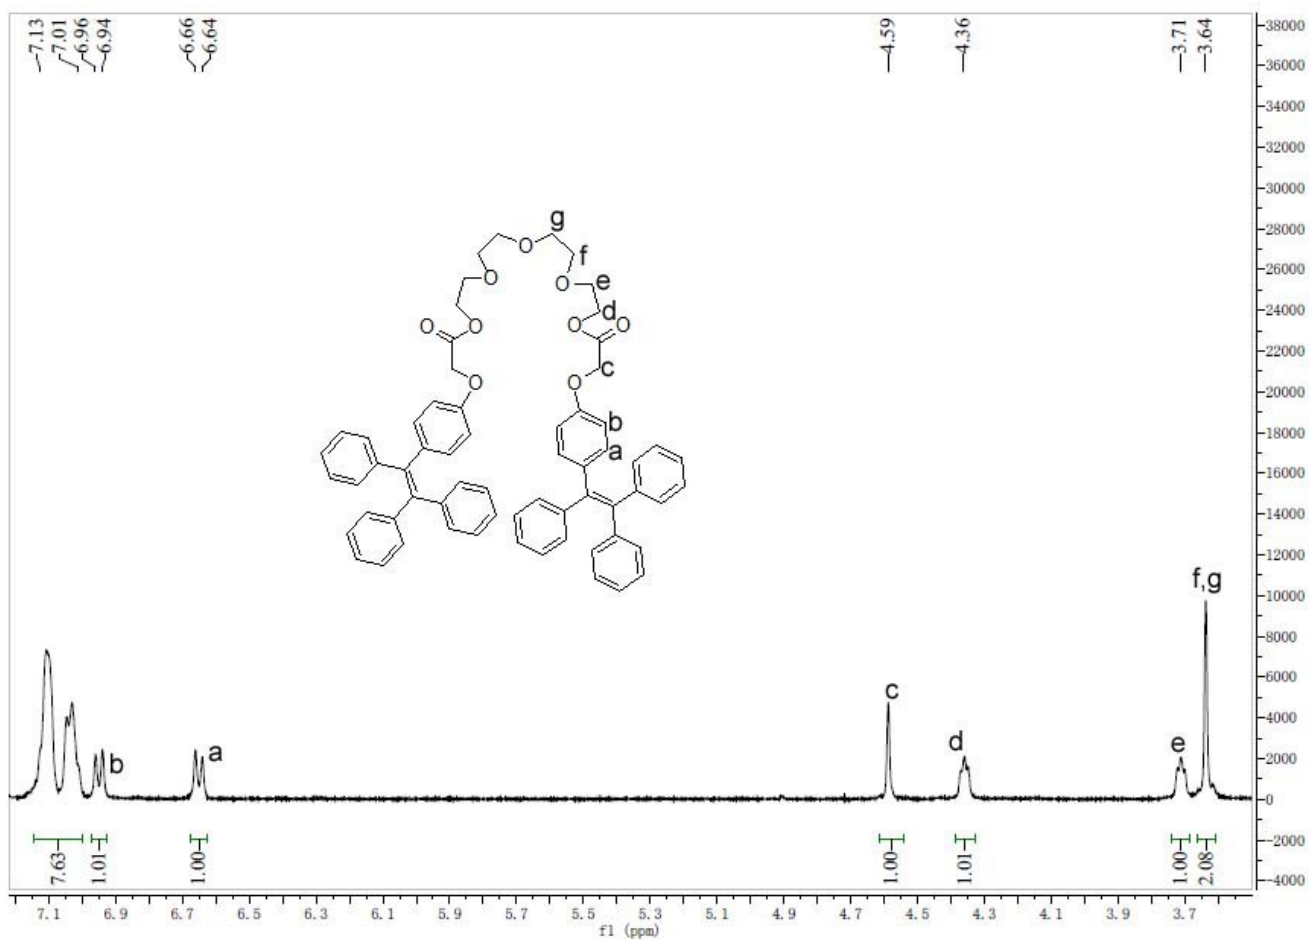

Figure S3. The  $^1\text{H}$  NMR spectrum of compound **Bis-TPE-3**

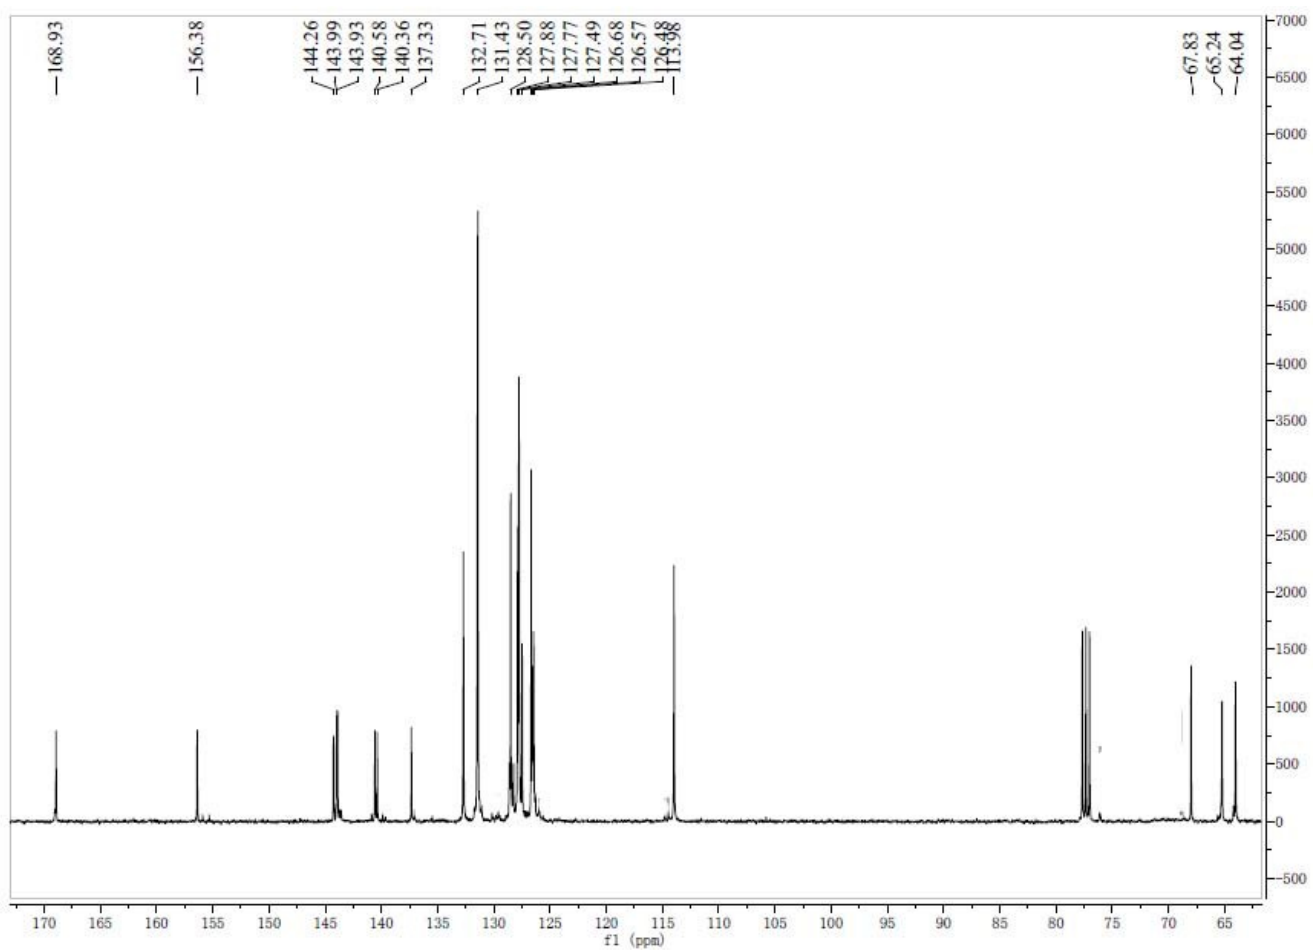

Figure S4. The  $^{13}\text{C}$  NMR spectrum of compound **Bis-TPE-1**

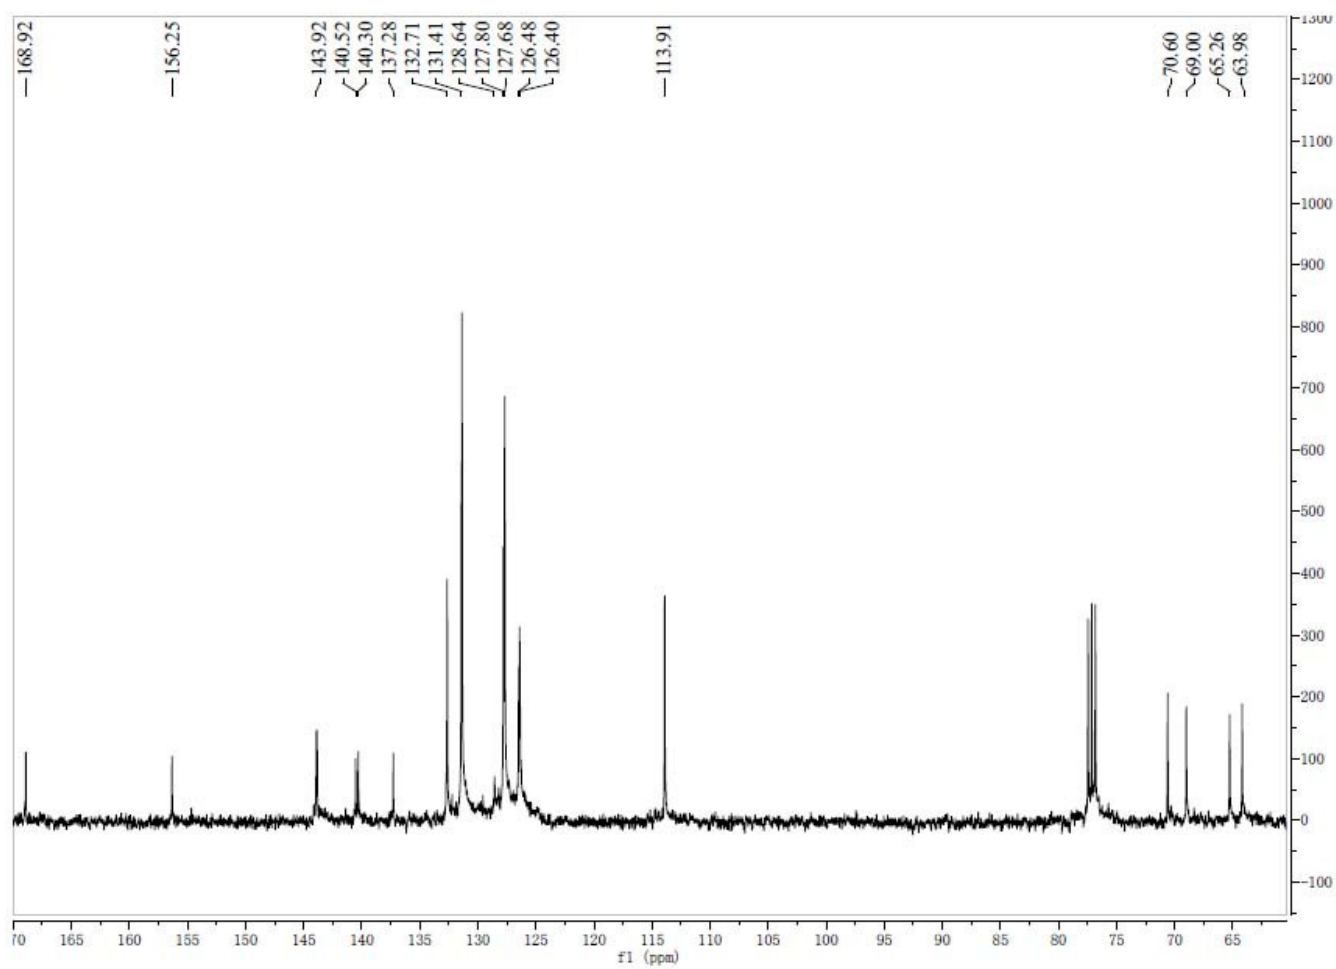

Figure S5. The  $^{13}\text{C}$  NMR spectrum of compound **Bis-TPE-2**

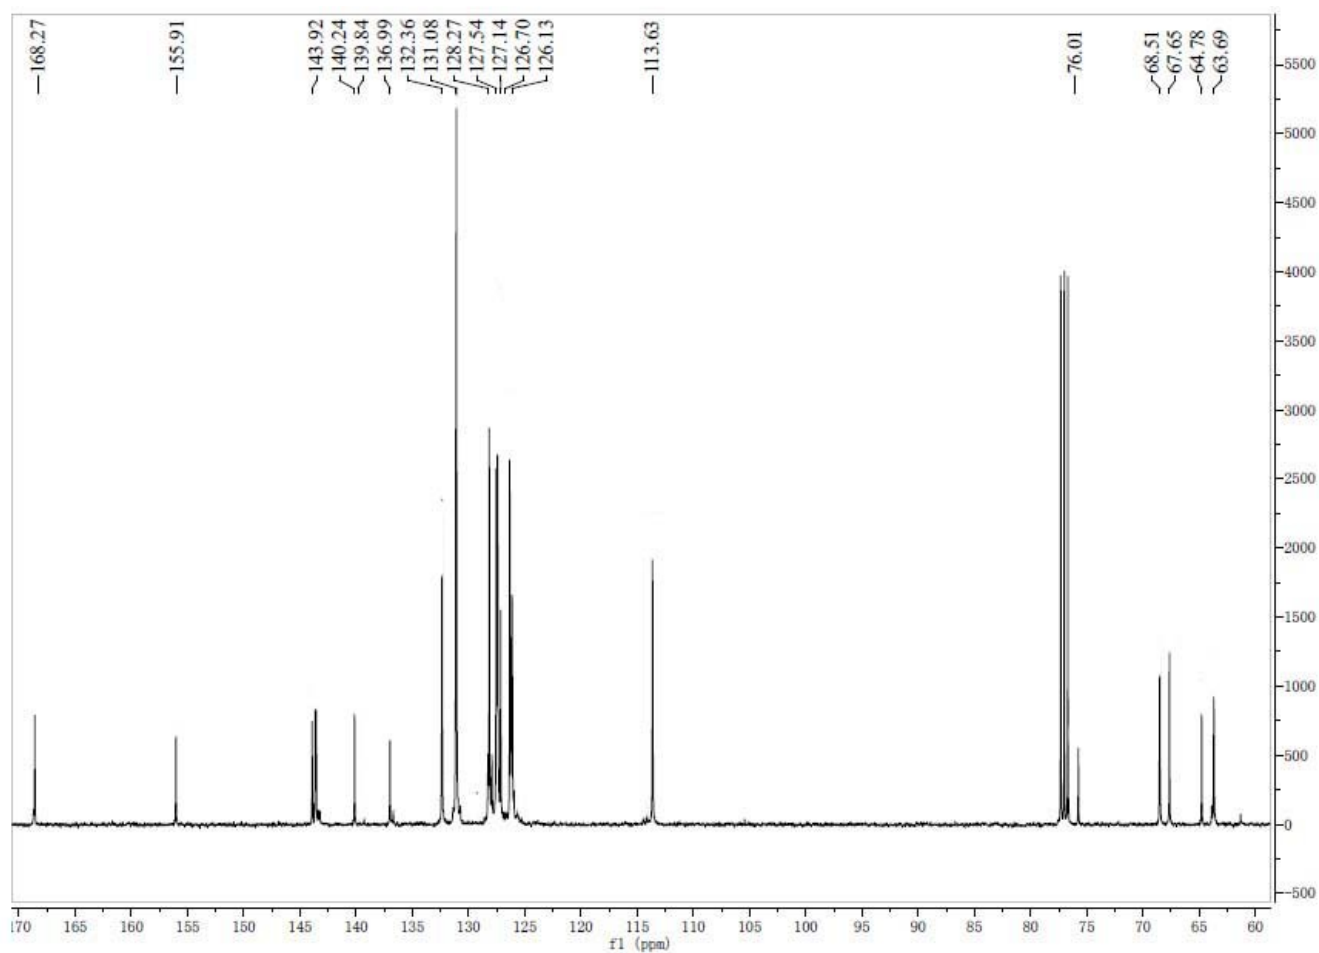

Figure S6. The  $^{13}\text{C}$  NMR spectrum of compound **Bis-TPE-3**

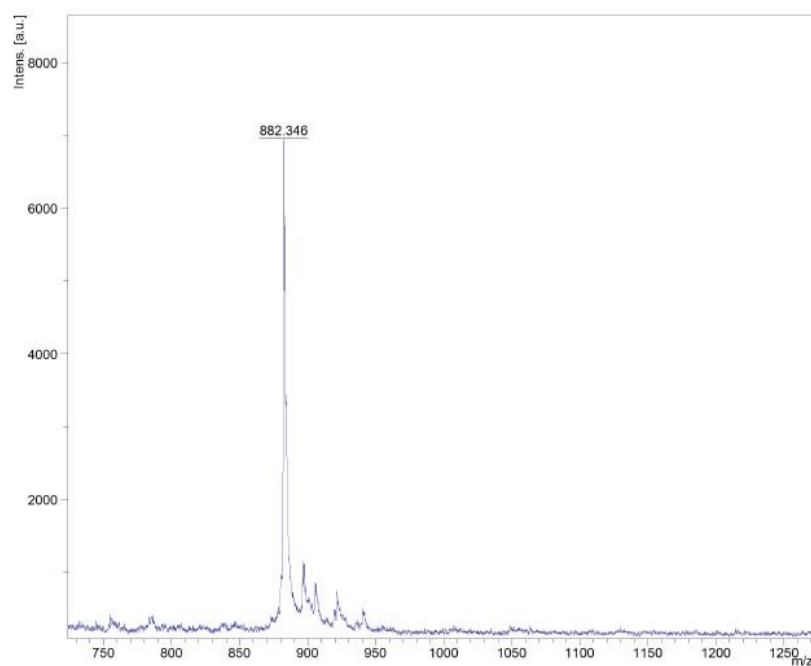

Figure S7. MALDI-TOF-MS spectrum of compound **Bis-TPE-1**



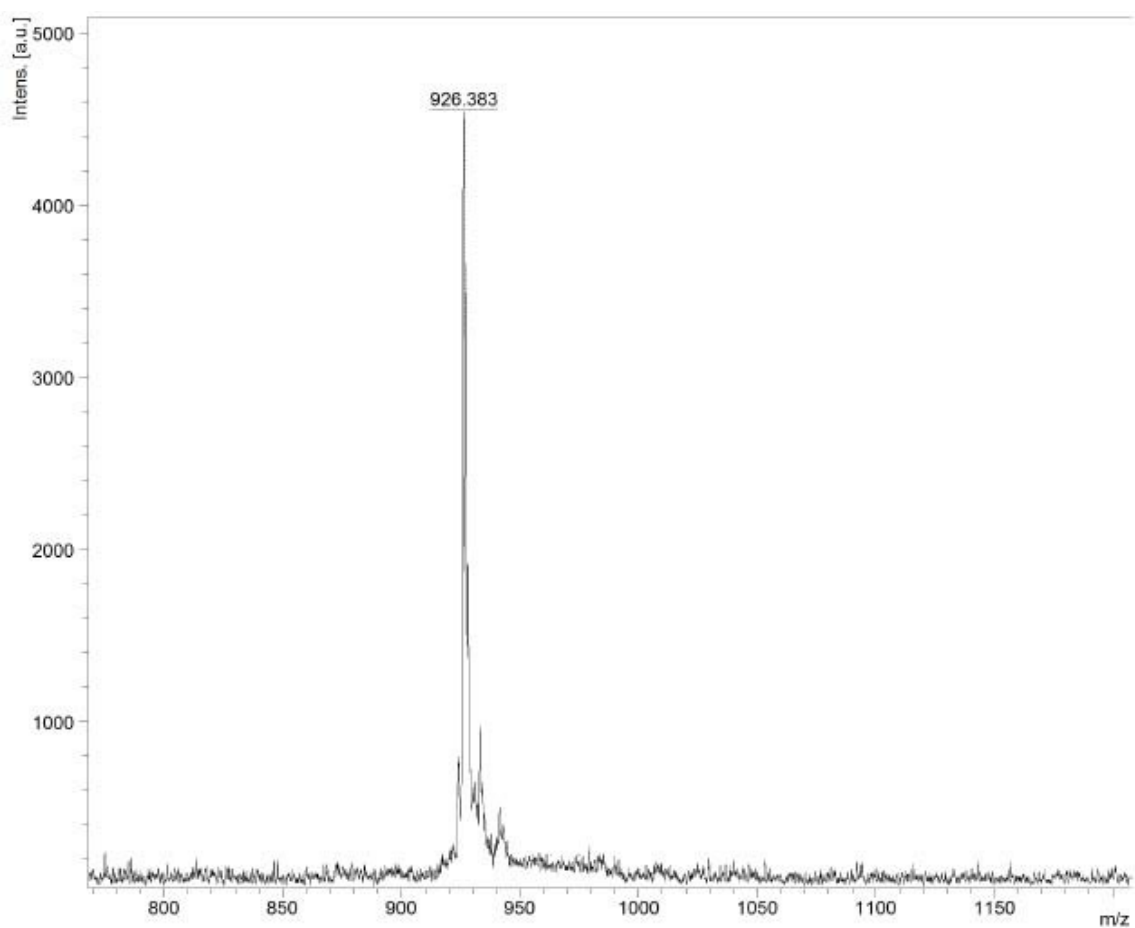

Figure S8. MALDI-TOF-MS spectrum of compound **Bis-TPE-2**

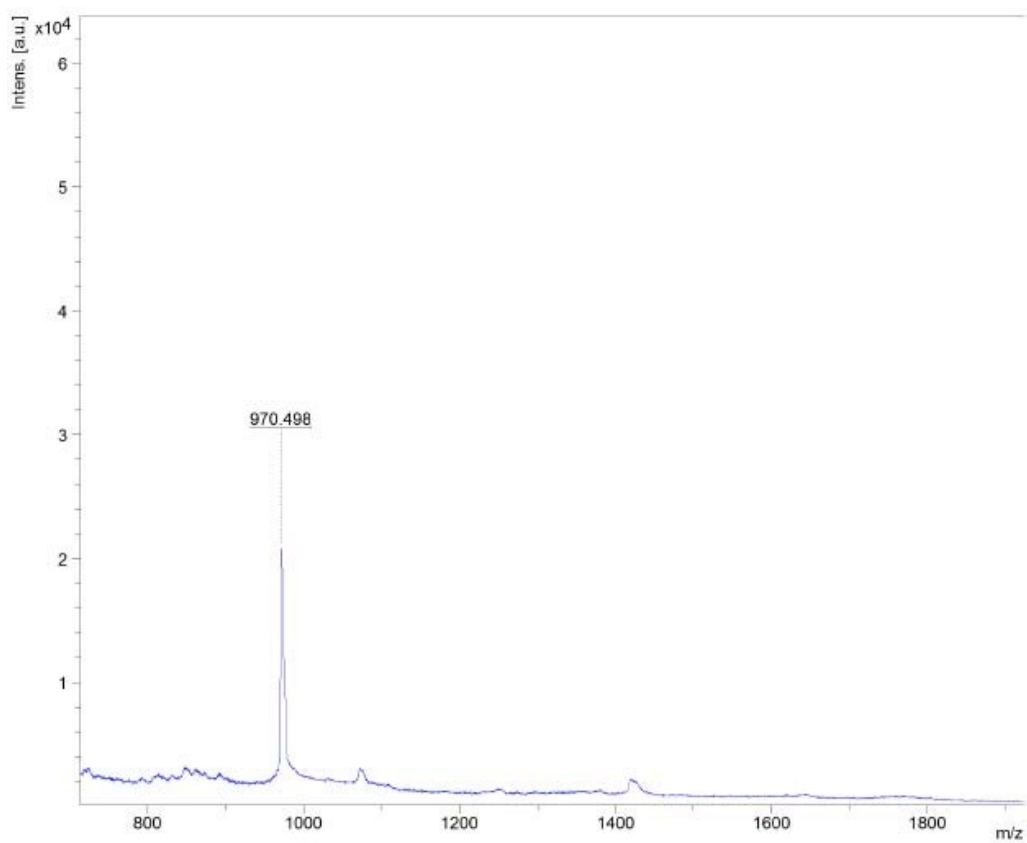

Figure S9. MALDI-TOF-MS spectrum of compound **Bis-TPE-3**

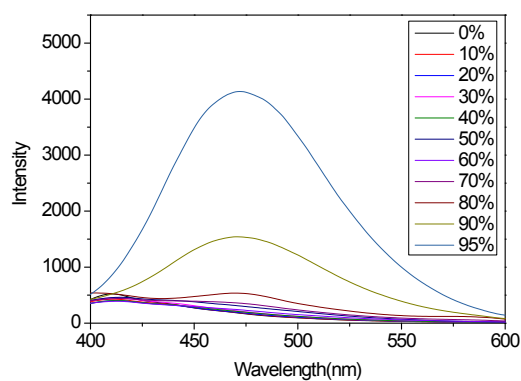

Figure S10 The fluorescence spectra of sample **Bis-TPE-2** in THF/H<sub>2</sub>O mixtures with different fractions of H<sub>2</sub>O ( $1 \times 10^{-5}$  M). excited at  $\lambda = 320$  nm.

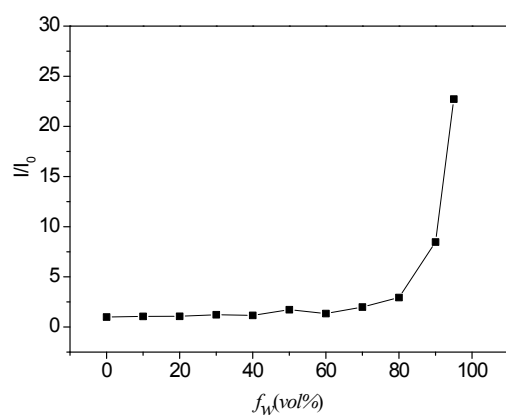

Figure S11 The ratio variation ( $I/I_0$ ) for fluorescence intensities of sample **Bis-TPE-2** with the changes of fractions of H<sub>2</sub>O in THF/H<sub>2</sub>O mixtures.

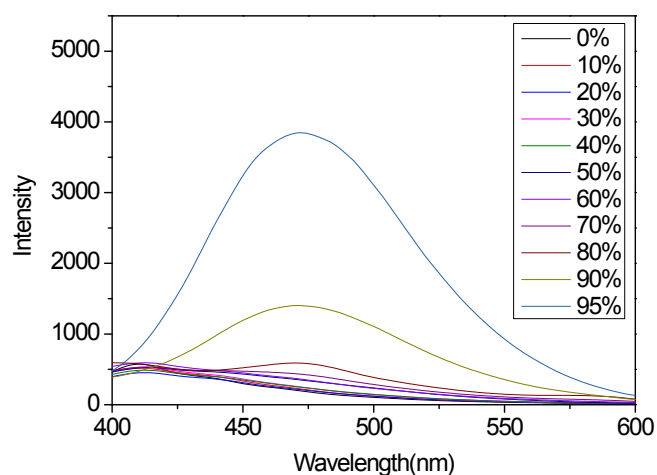

Figure S12 The fluorescence spectra of sample **Bis-TPE-3** in THF/H<sub>2</sub>O mixtures with different fractions of H<sub>2</sub>O ( $1 \times 10^{-5}$  M). excited at  $\lambda = 320$  nm.

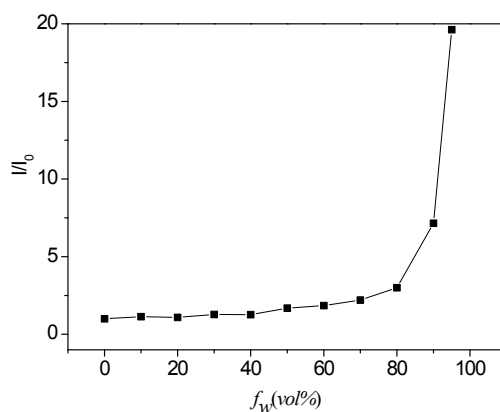

Figure S13 The ratio variation ( $I/I_0$ ) for fluorescence intensities of sample **Bis-TPE-3** with the changes of fractions of  $H_2O$  in THF/ $H_2O$  mixtures.

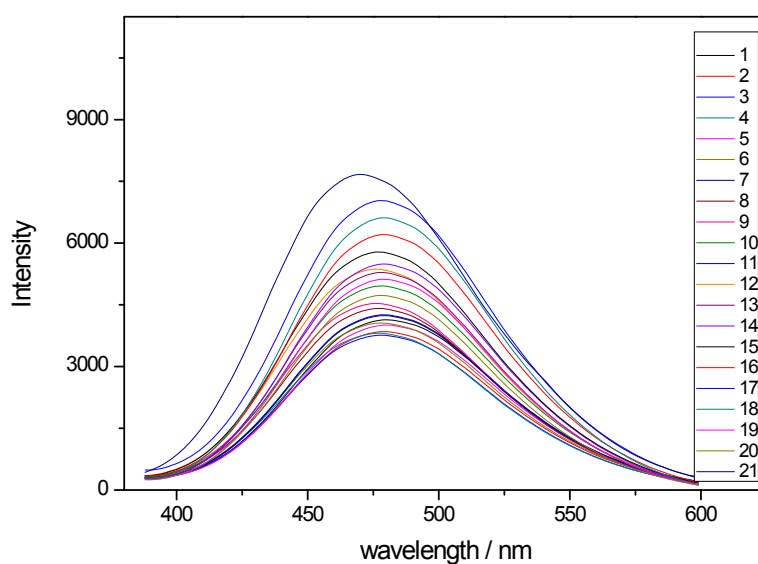

Figure S14 Fluorescence spectra of **Bis-TPE-2** ( $1 \times 10^{-5}$  M) with biomolecules 1-21 ( $2 \times 10^{-5}$  M) in THF/water (5:95) mixtures  $\lambda_{ex} = 360$  nm. (1 = None, 2 = leucine, 3 = cysteine, 4 = asprbic acid, 5 = tryptophan, 6 = guanine, 7 = adenine, 8 = cytosine, 9 = thymine, 10 = fructose, 11 = vitamin B1, 12 = starch, 13 = glucose, 14 = sucrose, 15 = vitamin B2, 16 = caffeine, 17 =  $Na^+$ , 18 =  $K^+$ , 19 =  $Mg^{2+}$ , 20 =  $Ca^{2+}$ , 21 = FA).

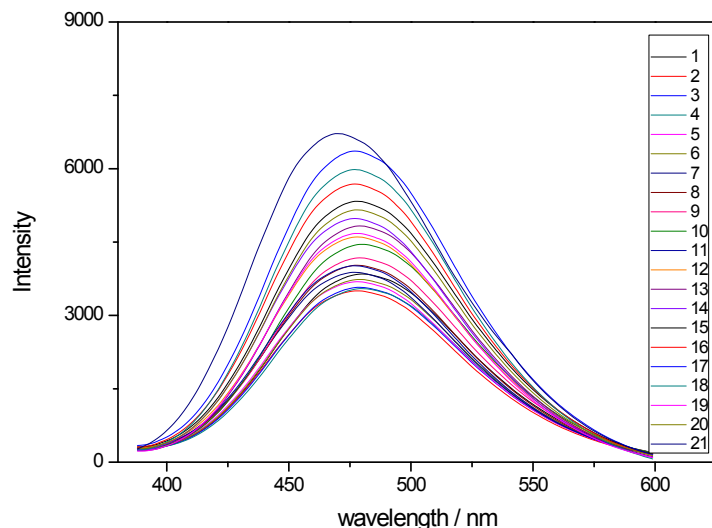

Figure S15 Fluorescence spectra of **Bis-TPE-3** ( $1 \times 10^{-5}$  M) with biomolecules 1-21 ( $2 \times 10^{-5}$  M) in THF/water (5:95) mixtures  $\lambda_{\text{ex}} = 360$  nm. (1 = None, 2 = leucine, 3 = cysteine, 4 = asprbic acid, 5 = tryptophan, 6 = guanine, 7 = adenine, 8 = cytosine, 9 = thymine, 10 = fructose, 11 = vitamin B1, 12 = starch, 13 = glucose, 14 = sucrose, 15 = vitamin B2, 16 = caffeine, 17 =  $\text{Na}^+$ , 18 =  $\text{K}^+$ , 19 =  $\text{Mg}^{2+}$ , 20 =  $\text{Ca}^{2+}$ , 21 = FA).

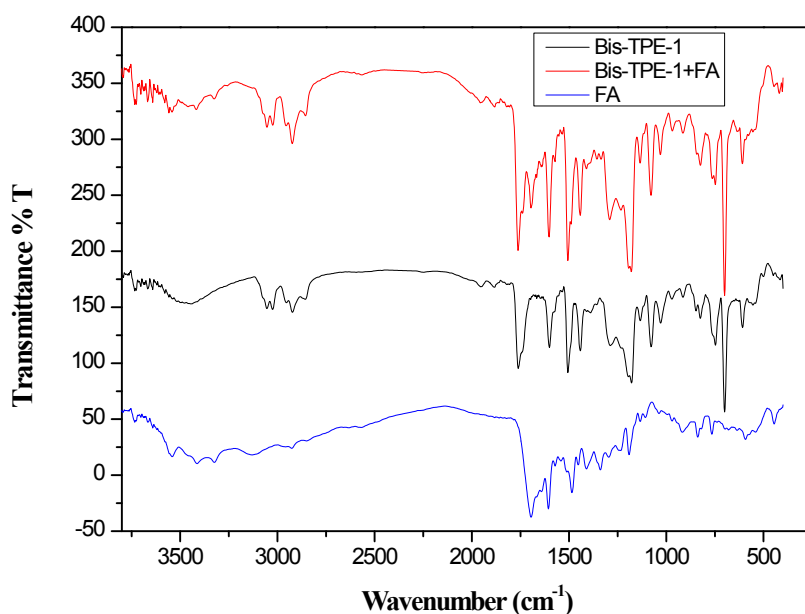

Figure S16 The FT-IR spectra of **Bis-TPE-1**, FA and **Bis-TPE-1** with FA (1:1).

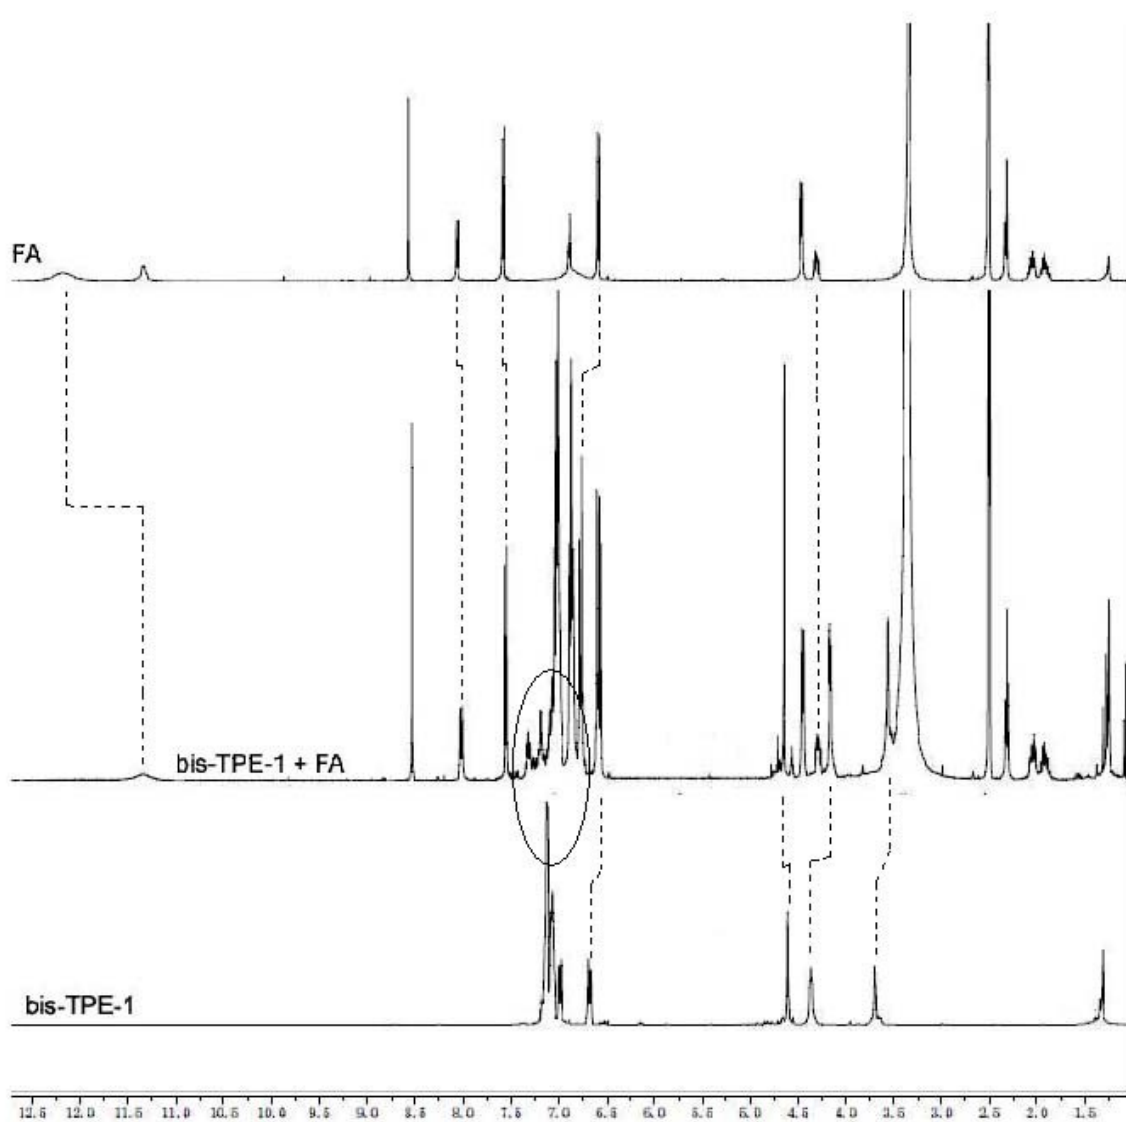

Figure S17 The comparison of  $^1\text{H}$  NMR of bis-TPE-1, FA and **bis-TPE-1** with FA (1:1).

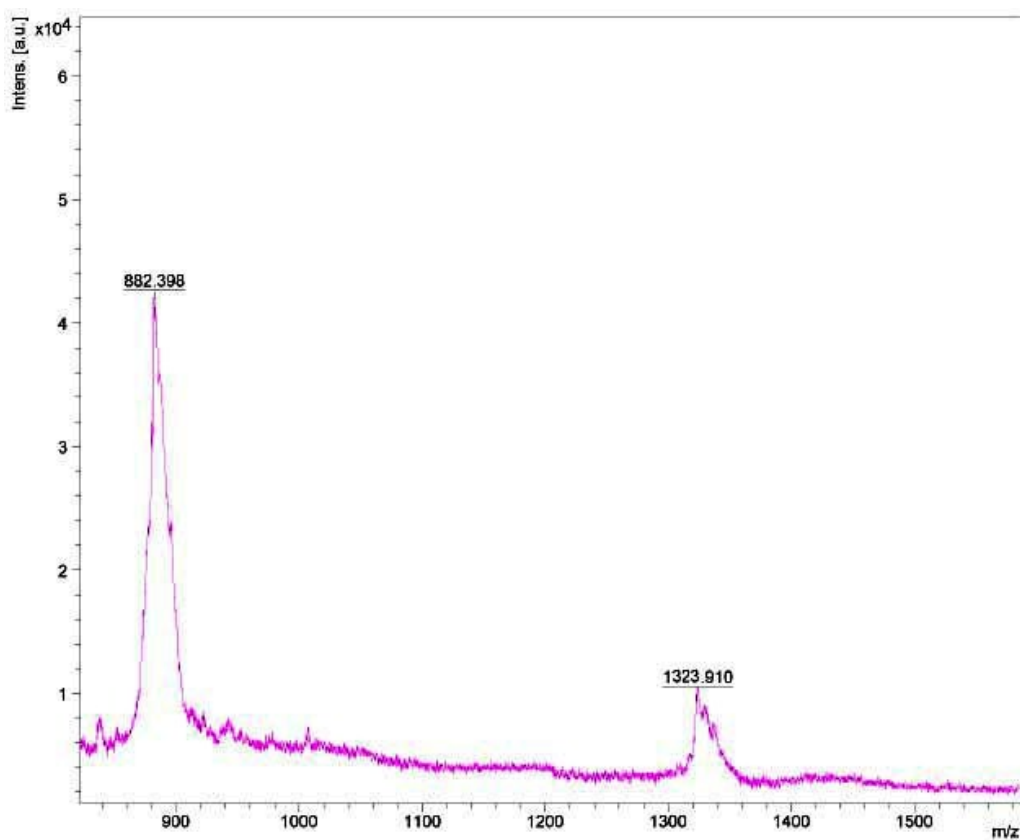

Figure S18 The MALDI-TOF-MS spectrum of compound **Bis-TPE-1** with 5.eq of FA.

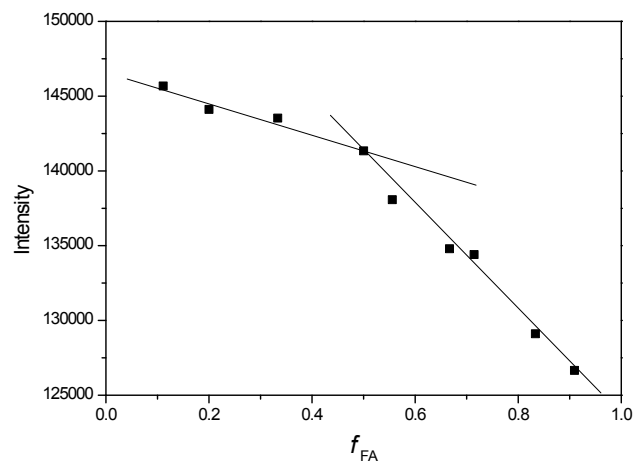

Figure S19. Fluorescence Jobs' plot ( $\lambda_{em} = 465$  nm,  $\lambda_{ex} = 360$  nm,) of **Bis-TPE-1** and FA in THF/H<sub>2</sub>O (9.5:0.5, V/V) solution with a total concentration of [the sensor] + [folic acid] = 20  $\mu$ M.

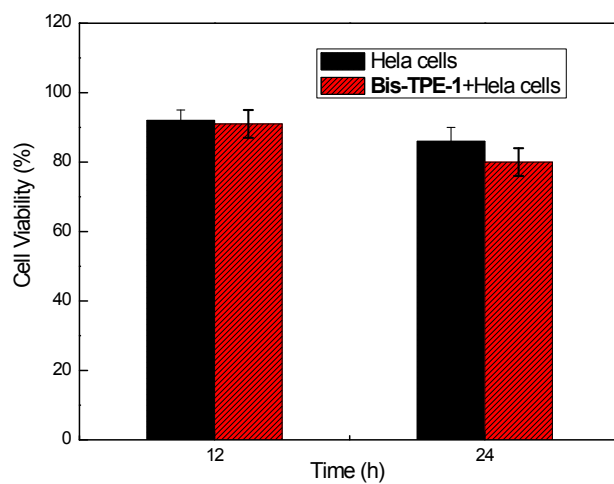

Figure S20 Cell viability of HeLa cells before and after incubated with **Bis-TPE-1** ( $1.0 \times 10^{-5}$  M) for 12 h and 24 h.
